# Supplementary material
Source: PubMed Central journal article supplement (PMC3076813)
Supplement: 1011274108_pnas.1011274108_SI.pdf [file 1011274108_pnas.1011274108_SI.pdf]

# Supporting Information

Kennedy and Erie 10.1073/pnas.1011274108

## SI Text

**SI Materials and Methods. Enzyme and templates.** His<sub>6</sub>-tagged  $\Delta$ -loop RNA polymerase (RNAP) was made by site-directed mutagenesis of the pRL-706 plasmid (gift of R. Landick). Expression was carried out in the *Escherichia coli* strain TOM100 (gift of T. Santangelo) and purified as previously described (1).

**Transcription elongation experiments.** To form open promoter complexes (OPCs), RNAP (80 nM) was combined with template DNA (80 nM) bound to streptavidin magnetic beads in 1 $\times$  transcription buffer [30 mM Hepes-NaOH (pH 8.0), 10 mM Mg<sup>2+</sup> glutamate, 200 mM K<sup>+</sup> glutamate, 25  $\mu$ g/mL BSA, and 1 mM DTT] and incubated at 37°C for 10 min. After incubation, stalled elongation complexes (SECs) at position +24 were formed by the addition of a mixture of 20  $\mu$ M ATP, 15  $\mu$ M UTP, 16  $\mu$ M GTP, and 4  $\mu$ M [ $\alpha$ -<sup>32</sup>P]-GTP (800 Ci/mmol) to the OPCs and incubating for 2 min at room temperature. SECs were purified from free nucleoside triphosphates (NTPs) and resuspended in 1 $\times$  transcription buffer prior to loading into a Kintek Rapid Quench 3 device (Kintek Corporation, Austin, TX).

**Rapid quench experiments.** The purified complexes were kept on ice until used in the experiments. Reactions were mixed (20  $\mu$ L of complexes and 20  $\mu$ L NTPs) in the Rapid Quench for the desired time prior to quenching with 0.5 M EDTA or 1 M HCl. To make sure that the time between time points while conducting the experiments did not affect the results, the order in which the time points were collected was randomized. In addition, to ensure that complexes were active throughout the experiments, a small aliquot of purified SECs was extended to full length by the addition of all 1 mM of all 4 NTPs. Samples were electrophoresed on an 8 M urea, 20% polyacrylamide gel and quantified using ImageQuant v5.2. Excess quench and buffer were removed from the EDTA quenched samples by retaining the complexes with a magnet, and then the complexes were denatured with formamide before loading on the gel. The HCl quenched samples were precipitated with ethanol and then resuspended in formamide before loading on the gel. Experiments involving a different template identity were performed as described above with the exception that the SECs were “walked” to position +26 by the addition of 10  $\mu$ M CTP and 10  $\mu$ M ATP. Complexes were allowed to react for 1 min and the free NTPs were removed and the complexes washed with ice-cold 1 $\times$  transcription buffer. The resulting cleaned SECs stalled at +26 were then used as described for the preincubation and simultaneous addition experiments with GTP and CTP.

**Shuttle experiments.** The NTP loading experiments were performed as follows. Unlabeled SECs were formed and purified

as described for the quench flow experiments, only in the absence of [<sup>32</sup>P]-GTP. The purified complexes were split into two sample groups (Fig. S6). To the preincubation sample group, 10  $\mu$ M [ $\alpha$ -<sup>32</sup>P]-ATP was added to the SECs prior to dividing the reaction into four aliquots of equal volume. The preincubation reactions were initiated with the following NTP mixtures: 100  $\mu$ M CTP; 100  $\mu$ M CTP and 100  $\mu$ M ATP; 100  $\mu$ M CTP and 1 mM ATP; or 100  $\mu$ M CTP and 5 mM ATP. The simultaneous addition sample group reactions were initiated with the same NTP mixtures except that 10  $\mu$ M [ $\alpha$ -<sup>32</sup>P]-ATP (800 Ci/mmol) was also included in all the mixtures. Reactions were allowed to proceed for  $\sim$ 10 s before quenching with 0.5 M EDTA. Samples were processed the same as the EDTA rapid quench flow experiments.

**Data analysis.** The percentage of complexes at each position was determined by dividing the amount of radioactivity of each band by the total amount of radioactivity in all the bands greater than or equal to 24 nucleotides in length [i.e., (band 24) + (band 25) + (band 26) + ..... = 100%] (plots in Fig. S1). Due to the observed misincorporation (i.e., complexes at template position +25 and higher) during SEC formation, it was necessary to normalize the data such that at 0 time, there was 0% incorporation and upon completion, there was 100% incorporation for CMP incorporation. To normalize the data for CMP incorporation, the sum of the percentage of complexes that were at +25 or higher [i.e., (band 25) + (band 26) + (band 27) + .....] prior to the addition of CTP were subtracted from each time point. The data were then normalized to 100% by dividing each time point by the highest percentage of complexes that reached +25 or higher. Normalization of the data from AMP incorporation was performed in a similar manner, with a few modifications: (i) the sum of the percentage of complexes that were at +26 and higher, instead of +25 and higher, [i.e., (band 26) + (band 27) + .....] prior to the addition of CTP were subtracted from each time point. (ii) AMP incorporation was normalized as a percentage of CMP incorporation by dividing each time point by the highest percentage of complexes that reached +25 or higher. The incorporation of AMP was normalized to the extent of CMP incorporation because AMP cannot incorporate without CMP being incorporated first. There are always some complexes stalled at +24 that do not elongate over the time course of the experiment, but do elongate in the chase reactions. In general, 70 to 80% of the complexes reach position +25 on the time scale of these reactions (1 s). As discussed previously, we consistently observe this extent of CMP incorporation and it is not dependent of the preparation of RNA polymerase (2, 3). The data were fit to single or double exponentials using the equations  $(a + b * (1 - \exp(-c * x)))$  and  $(a - b * \exp(-c * x) - (a - b) * (\exp(-d * x)))$ , respectively, where  $a$ ,  $b$ ,  $c$ , and  $d$  are variables.

1. Santangelo TJ, Mooney RA, Landick R, Roberts JW (2003) RNA polymerase mutations that impair conversion to a termination-resistant complex by Q antiterminator proteins. *Genes Dev* 17:1281–1292.
2. Foster JE, Holmes SF, Erie DA (2001) Allosteric binding of nucleoside triphosphates to RNA polymerase regulates transcription elongation. *Cell* 106:243–252.

3. Holmes SF, Santangelo TJ, Cunningham CK, Roberts JW, Erie DA (2006) Kinetic investigation of *Escherichia coli* RNA polymerase mutants that influence nucleotide discrimination and transcription fidelity. *J Biol Chem* 281:18677–18683.









**Table S1. Kinetic parameters of CMP and AMP incorporation for wild-type RNAP**

|          | Simultaneous                       |                                    |                                          | Preincubation                    |                                    |                                  |
|----------|------------------------------------|------------------------------------|------------------------------------------|----------------------------------|------------------------------------|----------------------------------|
|          | $k_{\text{fast}}(\text{s}^{-1})^*$ | $k_{\text{fast}}$ Burst Height (%) | $k_{\text{slow}}(\text{s}^{-1})^\dagger$ | $k_{\text{fast}}(\text{s}^{-1})$ | $k_{\text{fast}}$ Burst Height (%) | $k_{\text{slow}}(\text{s}^{-1})$ |
| CMP HCl  | -                                  | -                                  | $43.9 \pm 3.9$                           | $280 \pm 112$                    | $36.0 \pm 10.2$                    | $31.2 \pm 7.7$                   |
| AMP HCl  | -                                  | -                                  | $2.4 \pm 0.3$                            | $466 \pm 160$                    | $22.4 \pm 2.0$                     | $3.0 \pm 1.2$                    |
| CMP EDTA | $1,400^\ddagger$                   | $40.5 \pm 2.6$                     | $43.4 \pm 6.3$                           | $1,550 \pm 852$                  | $64.1 \pm 2.5$                     | $15.4 \pm 4.5$                   |
| AMP EDTA | $101 \pm 42$                       | $17.8 \pm 2.9$                     | $1.2 \pm 0.3$                            | $902 \pm 135$                    | $48.8 \pm 1.0$                     | $4.2 \pm 1.2$                    |

\* $k_{\text{fast}}$  is the rate of incorporation for the burst phase.

$k_{\text{slow}}$  is the rate of the slow phase observed in reactions exhibiting biphasic kinetics or is the rate constant for reactions fitting to a single exponential.

$^\ddagger$ Rate was derived from a manual fit to the data for the fast phase.
